# Supplementary material for: p53 Controls Meiotic Prophase Progression and Crossover Formation
Source: MDPI journal article supplement (doi:10.3390/ijms23179818), 2022-08-29
Supplement: s1 [file s1]

Table S1. Distribution of spermatocytes along the meiotic prophase in juvenile mice

| 17dpp<br>juvenile                            | %<br>Leptonema   | %<br>Zygonema   | %<br>Pachynema   | %<br>Diplotonema | Cells<br>analyzed | Mice<br>analyzed |
|----------------------------------------------|------------------|-----------------|------------------|------------------|-------------------|------------------|
| <b><i>p53</i><sup>+/-</sup></b><br>(mean±SD) | 23.63<br>±15.73  | 24.88<br>±8.31  | 50.50<br>±22.63  | 1.00<br>±1.41    | 800               | 2                |
| <b><i>p53</i><sup>-/-</sup></b><br>(mean±SD) | 16.75<br>±11.67* | 24.88<br>±10.43 | 55.63<br>±20.33* | 2.75<br>±1.77*   | 800               | 2                |

\* Significantly different from *p53*<sup>+/-</sup>, P < 0.05 Fisher's exact test.
