# Supplementary material for: p53 Controls Meiotic Prophase Progression and Crossover Formation
Source: MDPI journal article supplement (doi:10.3390/ijms23179818), 2022-08-29
Supplement: s1 [file s1]

**A**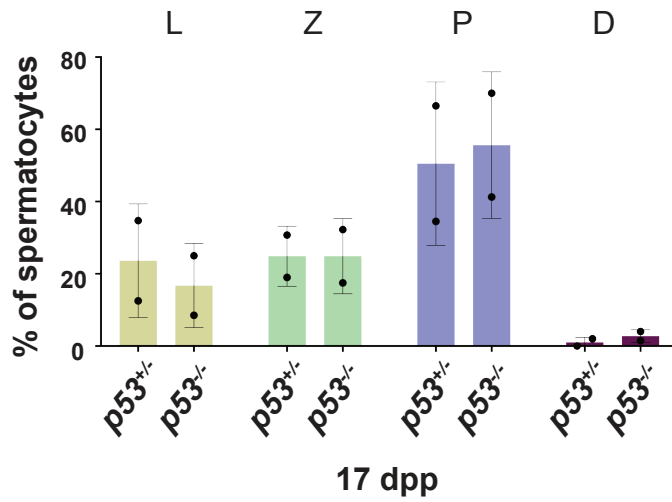**B**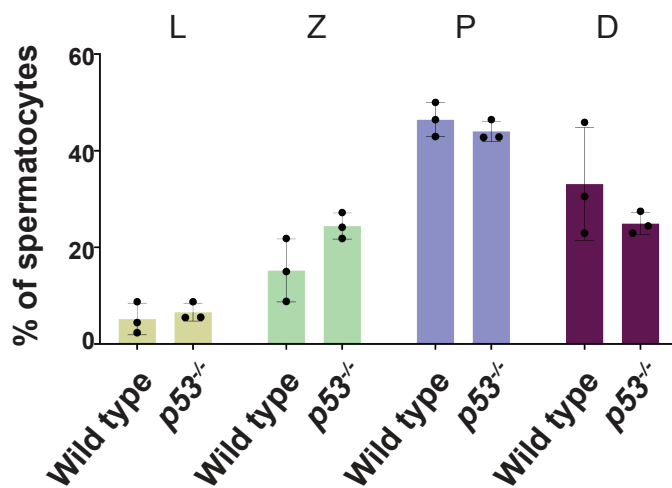

**Supplemental Figure S1. Meiotic prophase stages progression in p53 deficient spermatocytes.**

(A) Bar graph shows percentage of spermatocytes at each prophase stage (leptonema (L), zygonema (Z), pachynema (P), and diplonema (D) at 17 dpp in p53<sup>+/-</sup> (N=2) and p53<sup>-/-</sup> (N=2) mice. Bars represent mean  $\pm$  SD and black dots correspond to each individual mouse. (B) Bar graph represents percentage of spermatocytes at each prophase stage (leptonema (L), zygonema (Z), pachynema (P), and diplonema (D) in wild-type (N=3) and p53<sup>-/-</sup> (N=3) adult mice. Bars represent mean  $\pm$  SD and black dots correspond to one mouse analyzed.
