# Supplementary material for: p53 Controls Meiotic Prophase Progression and Crossover Formation
Source: MDPI journal article supplement (doi:10.3390/ijms23179818), 2022-08-29
Supplement: s1 [file s1]

Table S2. Distribution of spermatocytes along the meiotic prophase in adult mice

| Adult mice                                | %<br>Leptonema | %<br>Zygonema   | %<br>Pachynema | %<br>Diplonema  | Cells analyzed | Mice analyzed |
|-------------------------------------------|----------------|-----------------|----------------|-----------------|----------------|---------------|
| <b>Wild type</b><br>(mean<br>±SD)         | 5.18<br>±3.26  | 15.23<br>±6.52  | 46.46<br>±3.53 | 33.13<br>±11.68 | 533            | 3             |
| <b>p53<sup>-/-</sup></b><br>(mean<br>±SD) | 6.60<br>±1.86  | 24.42<br>±2.69* | 44.03<br>±2.10 | 24.96<br>±2.30* | 545            | 3             |

\* Significantly different from wild type, P < 0.05 Fisher's exact test.
